# Supplementary material for: Tri-layer structured intelligent hydrogel dressing for controlled-release antibacterial treatment of chronic diabetic wounds
Source: Royal Society of Chemistry journal article supplement (doi:10.1039/d5ra06906h), 2025-01-01
Supplement: d5ra06906h1.pdf [file d5ra06906h1.pdf]

**Supplementary Information**

**Tri-layer Structured Intelligent Hydrogel Dressing for  
Controlled-Release Antibacterial Treatment of Chronic  
Diabetic Wounds**

Weikai Zhang<sup>1,2,3\*</sup>, Xiuhong Fu<sup>4,5</sup>, Hewei Zhang<sup>1</sup>, Shaozhe Zhang<sup>4,5</sup>, Qingwei Zhang<sup>4,5</sup>, Chongkai Zhai<sup>1</sup>, Jinyang Zhao<sup>1,2,3</sup>, Quanzhong Yang<sup>1,2,3</sup>, Shuang Li<sup>1,2,3</sup>

<sup>1</sup> Institute of medical technology, Luoyang Polytechnic, Luoyang 471000, China

<sup>2</sup> Henan Engineering Research Center of Key Immunological Biomaterials, Luoyang Polytechnic, Luoyang 471000, China

<sup>3</sup> Zhongyuan Scholars Workstation of Henan, Luoyang Polytechnic, Luoyang 471000, Henan, China

<sup>4</sup> Henan Key Laboratory of Fertility Protection and Aristogenesis, Luohe Central Hospital, Luohe 462000, China

<sup>5</sup> Gynecology and Obstetrics Department, Luohe Central Hospital, Luohe 462000, China

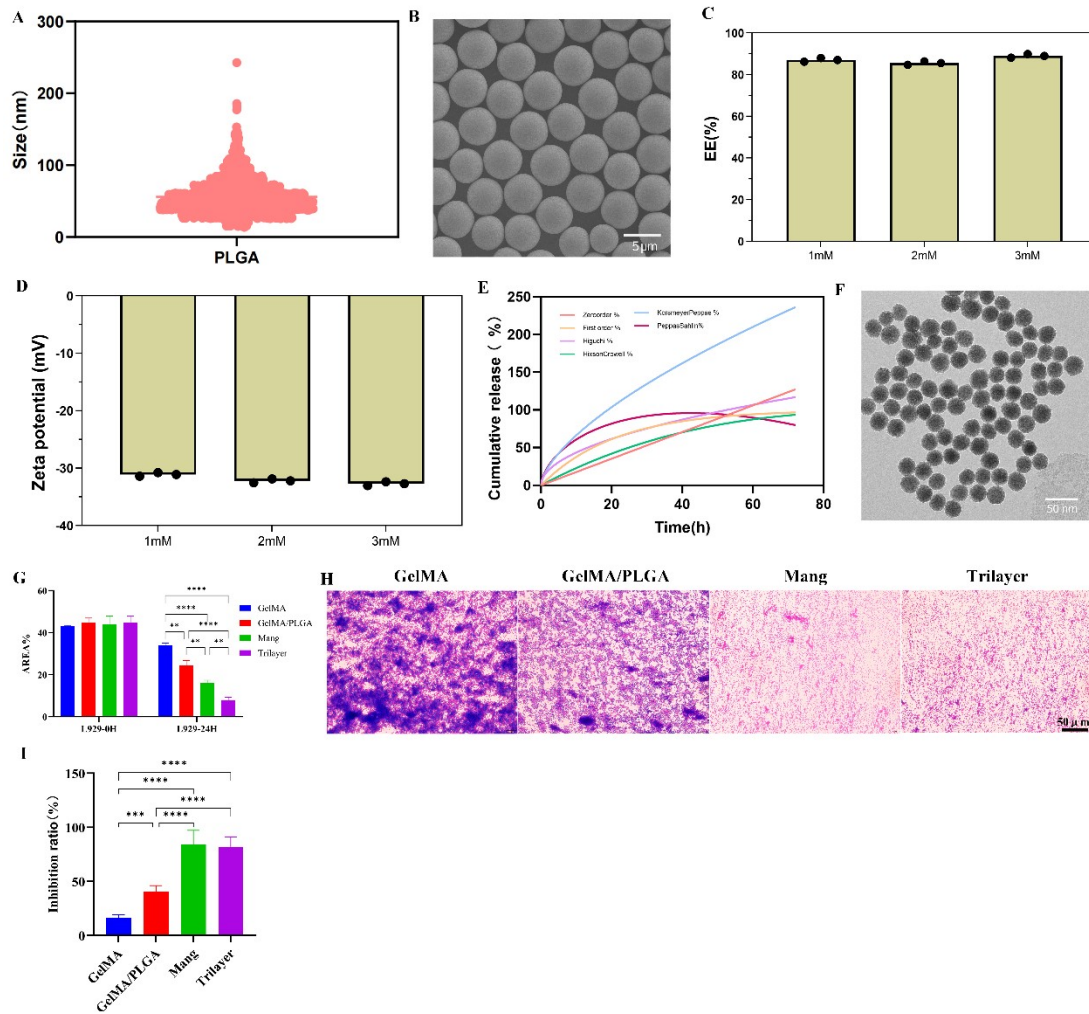

Figure S1. (A) Particle size distribution of the PLGA microspheres, measured by dynamic light scattering (DLS), shows a narrow, monomodal distribution centered around 4.8  $\mu\text{m}$ .

(B) SEM image of the poly(lactic-co-glycolic acid) (PLGA) microspheres used as drug carriers; the microspheres appear smooth and spherical (scale bar = 5  $\mu\text{m}$ ).

(C) Encapsulation Efficiency (EE) of Mangiferin with different concentration.

(D) Zeta potential of particle was measured by dynamic light scattering (DLS) using a Zetasizer Nano ZS instrument (Malvern, UK).

(E) Kinetic modeling of the drug release data: experimental release profiles (symbols) are overlaid with fitted curves for multiple empirical models (Higuchi, zero-order, first-order, Hixson–Crowell, Korsmeyer–Peppas, and Peppas–Sahlin).

(F) Transmission electron microscopy (TEM) image of the silver nanoparticles (AgNPs) used in the formulations shows uniform spherical particles (scale bar = 50 nm).

(G) Scratch wound images revealed distinct differences in the migration behavior of fibroblasts among the treatment groups. (\*\*\*\* $p < 0.0001$ , Two-ANOVA).

(H) (I) The biofilm inhibition assay: wells treated with tri-layer extracts had significantly lower crystal violet staining than control of GelMA group.
